# Supplementary material for: Association between kidney function, frailty and receipt of invasive management after acute coronary syndrome
Source: PubMed Central journal article supplement (PMC11474759; doi:10.1136/openhrt-2024-002875), 2024-10-09

# Supplementary materials

## Contents

### Table of Contents

|                                                                                                                                                                                                                                                                                 |    |
|---------------------------------------------------------------------------------------------------------------------------------------------------------------------------------------------------------------------------------------------------------------------------------|----|
| Contents.....                                                                                                                                                                                                                                                                   | 1  |
| Tables.....                                                                                                                                                                                                                                                                     | 2  |
| <b>Supplementary table 1:</b> English Hospital Trusts hosting NIHR Biomedical Research Centres contributing data towards the National Institute for Health Research Health Informatics Collaborative 2008-2017.....                                                             | 2  |
| <b>Supplementary table 2:</b> Diagnostic terms relating to ICD-10 diagnostic codes. ....                                                                                                                                                                                        | 3  |
| <b>Supplementary table 3.</b> ICD-v10 items included in the Multimorbidity Frailty index (v10) and Hospital Frailty Risk Score.....                                                                                                                                             | 4  |
| <b>Supplementary table 4:</b> Covariables identified “a priori” as potential effect modifiers of the association between low eGFR and reduced use of invasive management after ACS due to their potential causative association with eGFR, coronary intervention and death..... | 9  |
| <b>Supplementary table 5:</b> Covariables included in the propensity score. ....                                                                                                                                                                                                | 9  |
| <b>Supplementary table 6:</b> Covariates included in the multiple imputation model. ....                                                                                                                                                                                        | 9  |
| <b>Supplementary table 7:</b> Detailed methodology for sensitivity analyses designed to investigate potential sources of bias in the association between eGFR category and coronary angiography following ACS: .....                                                            | 10 |
| <b>Supplementary table 8:</b> Table of characteristics for patients for whom a kidney test result was available (included in main analyses) and those excluded from analyses due to lack of available kidney test result. ....                                                  | 12 |
| <b>Supplementary table 9:</b> Multivariable-adjusted odds of inpatient angiography by eGFR category and ACS type using different methods of adjustment for the competing risk of death. ....                                                                                    | 13 |
| <b>Supplementary table 10.</b> Comparison of effect estimates for the odds of inpatient angiography for people with eGFR<60mls/min/1.73m <sup>2</sup> versus those with an eGFR≥60 between multivariable and propensity score adjusted models, by ACS type.....                 | 14 |
| <b>Supplementary table 11:</b> Comparison of the multivariable-adjusted odds of inpatient angiography by eGFR category and ACS type using a complete case analysis versus multiple imputation of missing ethnicity data. ....                                                   | 15 |
| <b>Supplementary table 12:</b> Multivariable-adjusted odds of inpatient angiography by eGFR category and ACS type, with adjustment for Multimorbidity frailty index, Hospital frailty risk score or comorbidity count.....                                                      | 16 |
| <b>Supplementary table 13:</b> Multivariable-adjusted odds of inpatient angiography by ACS type, with and without adjustment for clustering at the hospital level. ....                                                                                                         | 17 |
| <b>Supplementary table 14:</b> Multivariable-adjusted odds ratios for inpatient angiography adjusted for composite CVD variable versus multiple distinct CVD-related variables.....                                                                                             | 18 |

|                                                                                                                                                                                                                                  |    |
|----------------------------------------------------------------------------------------------------------------------------------------------------------------------------------------------------------------------------------|----|
| <b>Supplementary table 15:</b> Multivariable-adjusted odds ratios for inpatient angiography without and with inclusion of people with a first troponin value recorded within the 24 hours following a coronary intervention..... | 19 |
| <b>Supplementary table 16:</b> Multivariable-adjusted odds of angiography by eGFR category and ACS type, with and without inclusion of patients with a code for revascularization but not for angiography .....                  | 19 |
| <b>Supplementary table 17:</b> Multivariable-adjusted odds ratios for inpatient angiography and revascularisation by eGFR category for people with NSTEMI-ACS with and without inclusion of those with unstable angina.....      | 20 |
| <b>Supplementary table 18:</b> Multivariable-adjusted odds ratios for revascularisation by eGFR category and ACS type, stratified by age group.....                                                                              | 21 |
| <b>Supplementary table 19:</b> Multivariable-adjusted odds ratios for revascularisation after STEMI comparing eGFR>60mls/min/1.73m <sup>2</sup> to eGFR categories <60, stratified by age group.....                             | 21 |
| <b>Supplementary table 19:</b> STROBE Reporting Checklist.....                                                                                                                                                                   | 22 |
| Figures.....                                                                                                                                                                                                                     | 25 |
| <b>Supplementary figure 1:</b> Flow chart of inclusion/exclusion .....                                                                                                                                                           | 25 |

## Tables

**Supplementary table 1:** English Hospital Trusts hosting NIHR Biomedical Research Centres contributing data towards the National Institute for Health Research Health Informatics Collaborative 2008-2017.

The NIHR HIC is a partnership of NHS Trusts, Organisations and Health Boards, including those hosting NIHR Biomedical Research Centres, designed to facilitate the equitable re-use of National Health Service data for translational research. Routine clinical data is extracted from the electronic health systems of contributing NHS Trusts (Five Trusts at the time of this data extract). The NIHR HIC Cardiovascular dataset employed in this analysis contains clinical data on all patients who underwent troponin testing within 24 hours of hospital admission. We then selected individuals from this dataset who had had a diagnosis of ACS confirmed according to the discharge diagnosis (in positions one or two).

| <b>Healthcare Trusts</b>            |
|-------------------------------------|
| Imperial College Healthcare, London |
| University College Hospital, London |
| Oxford University Hospitals, Oxford |
| King's College Hospital, London     |

**Supplementary table 2:** Diagnostic terms relating to ICD-10 diagnostic codes.

| Diagnosis                                 | Diagnostic terms from ICD-10                                                                                                                                                                                                                                                                                                                                                                                                                                                                                                                                                                                                                                                                                                                                                                                                                                                                                                                                                                                                                                                                                                                                                                                                                                                                                                                                                                                                                                                                       |
|-------------------------------------------|----------------------------------------------------------------------------------------------------------------------------------------------------------------------------------------------------------------------------------------------------------------------------------------------------------------------------------------------------------------------------------------------------------------------------------------------------------------------------------------------------------------------------------------------------------------------------------------------------------------------------------------------------------------------------------------------------------------------------------------------------------------------------------------------------------------------------------------------------------------------------------------------------------------------------------------------------------------------------------------------------------------------------------------------------------------------------------------------------------------------------------------------------------------------------------------------------------------------------------------------------------------------------------------------------------------------------------------------------------------------------------------------------------------------------------------------------------------------------------------------------|
| Aortic stenosis                           | Aortic (valve) stenosis; Aortic (valve) stenosis with insufficiency                                                                                                                                                                                                                                                                                                                                                                                                                                                                                                                                                                                                                                                                                                                                                                                                                                                                                                                                                                                                                                                                                                                                                                                                                                                                                                                                                                                                                                |
| Arrhythmia                                | Atrial fibrillation and flutter, Supraventricular tachycardia, Ventricular tachycardia, Ventricular fibrillation, Atrioventricular block                                                                                                                                                                                                                                                                                                                                                                                                                                                                                                                                                                                                                                                                                                                                                                                                                                                                                                                                                                                                                                                                                                                                                                                                                                                                                                                                                           |
| Cardiac failure                           | Congestive heart failure, Left ventricular failure, Heart failure unspecified, Hypertensive heart disease with (congestive) heart failure                                                                                                                                                                                                                                                                                                                                                                                                                                                                                                                                                                                                                                                                                                                                                                                                                                                                                                                                                                                                                                                                                                                                                                                                                                                                                                                                                          |
| Cardiovascular disease                    | Old myocardial infarction, Peripheral vascular disease unspecified, Other specified peripheral vascular diseases, Atherosclerosis of arteries of extremities, Thoracic aortic aneurysm without mention of rupture, Abdominal aortic aneurysm without mention of rupture, Cerebral infarction unspecified, Other cerebral infarction, Cerebral infarction due to unspecified occlusion or stenosis of cerebral arteries, Cerebral infarction due to embolism of cerebral arteries, Cerebral infarction due to thrombosis of cerebral arteries, Sequelae of cerebral infarction, Intracerebral haemorrhage in brain stem, Intracerebral haemorrhage unspecified, Intracerebral haemorrhage in cerebellum, Congestive heart failure, Left ventricular failure, Heart failure unspecified, Hypertensive heart disease with (congestive) heart failure, Angina pectoris unspecified, Other forms of angina pectoris, Primary (essential) hypertension, Essential (primary) hypertension, Hypertensive renal disease with renal failure, Hypertensive heart and renal disease, Hypertension secondary to other renal disease, Hypertensive renal disease with renal failure, Hypertensive heart disease with (congestive) heart failure, Atherosclerotic heart disease; Chronic ischaemic heart disease, Personal history of disorders of the circulatory system, Coronary angioplasty implant, Presence of aortocoronary bypass graft, Transient cerebral ischaemic attack unspecified, Amaurosis fugax |
| Chronic obstructive pulmonary disease     | Emphysema unspecified, Unspecified chronic bronchitis, Chronic obstructive pulmonary disease unspecified, Chronic obstructive pulmonary disease with acute lower respiratory infection, Chronic obstructive pulmonary disease with acute exacerbation unspecified                                                                                                                                                                                                                                                                                                                                                                                                                                                                                                                                                                                                                                                                                                                                                                                                                                                                                                                                                                                                                                                                                                                                                                                                                                  |
| Diabetes mellitus                         | Diabetic polyneuropathy, Non-insulin dependent diabetes mellitus, Diabetic retinopathy, Diabetic mononeuropathy, Insulin-dependent diabetes mellitus, Unspecific diabetes mellitus, Glomerular disorders in diabetes mellitus, Other specific diabetes mellitus                                                                                                                                                                                                                                                                                                                                                                                                                                                                                                                                                                                                                                                                                                                                                                                                                                                                                                                                                                                                                                                                                                                                                                                                                                    |
| Family history of ischaemic heart disease | Family history of ischaemic heart disease                                                                                                                                                                                                                                                                                                                                                                                                                                                                                                                                                                                                                                                                                                                                                                                                                                                                                                                                                                                                                                                                                                                                                                                                                                                                                                                                                                                                                                                          |
| Haemorrhagic cerebrovascular event        | Intracerebral haemorrhage in brain stem, Intracerebral haemorrhage unspecified, Intracerebral haemorrhage in cerebellum                                                                                                                                                                                                                                                                                                                                                                                                                                                                                                                                                                                                                                                                                                                                                                                                                                                                                                                                                                                                                                                                                                                                                                                                                                                                                                                                                                            |
| Hypercholesterolaemia                     | Pure hypercholesterolaemia                                                                                                                                                                                                                                                                                                                                                                                                                                                                                                                                                                                                                                                                                                                                                                                                                                                                                                                                                                                                                                                                                                                                                                                                                                                                                                                                                                                                                                                                         |
| Ischaemic cerebrovascular event           | Cerebral infarction unspecified, Other cerebral infarction, Cerebral infarction due to unspecified occlusion or stenosis of cerebral arteries, Cerebral infarction due to embolism of cerebral arteries, Cerebral infarction due to thrombosis of cerebral arteries, Sequelae of cerebral infarction                                                                                                                                                                                                                                                                                                                                                                                                                                                                                                                                                                                                                                                                                                                                                                                                                                                                                                                                                                                                                                                                                                                                                                                               |
| Ischaemic heart disease                   | Atherosclerotic heart disease; Chronic ischaemic heart disease, Personal history of disorders of the circulatory system, Coronary angioplasty implant, Presence of aortocoronary bypass graft                                                                                                                                                                                                                                                                                                                                                                                                                                                                                                                                                                                                                                                                                                                                                                                                                                                                                                                                                                                                                                                                                                                                                                                                                                                                                                      |

|                                        |                                                                                                                                                                                                                                                                                                                                                                                                                                                                                                                                                         |
|----------------------------------------|---------------------------------------------------------------------------------------------------------------------------------------------------------------------------------------------------------------------------------------------------------------------------------------------------------------------------------------------------------------------------------------------------------------------------------------------------------------------------------------------------------------------------------------------------------|
| Liver disease                          | Alcoholic liver disease unspecified, Liver disease unspecified, Autoimmune hepatitis, Chronic viral hepatitis C, Acute hepatitis B without delta-agent and without hepatic coma, Acute hepatitis C, Chronic hepatitis unspecified, , Fatty (change of) liver not elsewhere classified, Other and unspecified cirrhosis of liver, Cystic disease of liver, Alcoholic cirrhosis of liver, Chronic hepatic failure, Hepatic failure unspecified, Oesophageal varices with bleeding in diseases classified elsewhere, Oesophageal varices without bleeding, |
| Malignancy                             | Malignant neoplasm of X, Personal history of malignant neoplasm of X, Malignant neoplasm: X, Secondary and unspecified malignant neoplasm: X, Secondary malignancy neoplasm of X, Chronic lymphocytic leukaemia of B-cell type, Chronic myeloid leukaemia, Non-Hodgkin lymphoma unspecified, B-cell lymphoma unspecified, Hodgkin lymphoma unspecified, Other classical Hodgkin lymphoma, Diffuse large B-cell lymphoma                                                                                                                                 |
| Mental health disorder                 | Depressive episode unspecified, Mixed anxiety and depressive disorder, Delusional disorder, Personality disorder unspecified, Emotionally unstable personality disorder, Paranoid schizophrenia, Bipolar affective disorder unspecified, Mental and behavioural disorders due to multiple drug use and use of other psychoactive substances                                                                                                                                                                                                             |
| Non ST-elevation myocardial infarction | Acute myocardial infarction unspecified, Acute subendocardial myocardial infarction, Subsequent myocardial infarction                                                                                                                                                                                                                                                                                                                                                                                                                                   |
| Obesity                                | Other obesity, Obesity unspecified, Extreme obesity with alveolar hypoventilation,                                                                                                                                                                                                                                                                                                                                                                                                                                                                      |
| Previous myocardial infarction         | Old myocardial infarction                                                                                                                                                                                                                                                                                                                                                                                                                                                                                                                               |
| Renal dialysis                         | Dependence on renal dialysis, Extracorporeal dialysis, Kidney dialysis, Mechanical complications of dialysis catheter                                                                                                                                                                                                                                                                                                                                                                                                                                   |
| Renal transplant                       | Kidney transplant failure and rejection, Kidney transplant status                                                                                                                                                                                                                                                                                                                                                                                                                                                                                       |
| Smoking                                |                                                                                                                                                                                                                                                                                                                                                                                                                                                                                                                                                         |
| ST-elevation myocardial infarction     | Acute transmural myocardial infarction of anterior wall, Acute transmural myocardial infarction of inferior wall, Acute transmural myocardial infarction of other sites<br>Sudden cardiac death so described; Cardiac arrest unspecified, Cardiac arrest with successful resuscitation                                                                                                                                                                                                                                                                  |
| Unstable angina                        | Transient cerebral ischaemic attack unspecified, Amaurosis fugax<br>Unstable angina                                                                                                                                                                                                                                                                                                                                                                                                                                                                     |
| Venous thrombo-embolism                | Pulmonary embolism without mention of acute cor pulmonale, Embolism and thrombosis of lower extremities                                                                                                                                                                                                                                                                                                                                                                                                                                                 |

**Supplementary table 3.** ICD-v10 items included in the Multimorbidity Frailty index (v10) and Hospital Frailty Risk Score.

| ICD-v10 code | Description                                                                          | Weighting applied    |                   |
|--------------|--------------------------------------------------------------------------------------|----------------------|-------------------|
|              |                                                                                      | mFI-v10 <sup>1</sup> | HFRS <sup>2</sup> |
| A04          | Other bacterial intestinal infections                                                | 0                    | 1.1               |
| A09          | Diarrhoea & gastroenteritis of presumed infectious origin                            | 0                    | 1.1               |
| A41          | Other septicaemia                                                                    | 0                    | 1.6               |
| B95          | Streptococcus & staphylococcus as the cause of diseases classified to other chapters | 0                    | 1.7               |
| B96          | Other bacterial agents as the cause of diseases classified to other chapters         | 0                    | 2.9               |

|     |                                                                          |   |     |
|-----|--------------------------------------------------------------------------|---|-----|
| D64 | Other anaemias                                                           | 0 | 0.4 |
| E05 | Thyrotoxicosis                                                           | 0 | 0.9 |
| E16 | Other disorders of pancreatic internal secretion                         | 0 | 1.4 |
| E53 | Deficiency of other B group vitamins                                     | 0 | 1.9 |
| E55 | Vitamin D deficiency                                                     | 0 | 1.0 |
| E83 | Disorders of mineral metabolism                                          | 0 | 0.4 |
| E86 | Volume depletion                                                         | 0 | 2.3 |
| E87 | Disorders of electrolyte & fluid balance                                 | 1 | 2.3 |
| F00 | Dementia in Alzheimer's disease                                          | 0 | 7.1 |
| F01 | Vascular dementia                                                        | 0 | 2.0 |
| F03 | Dementia                                                                 | 1 | 2.1 |
| F05 | Delirium, not induced by alcohol & other psychoactive substances         | 0 | 3.2 |
| F10 | mental & behavioural disorders due to use of alcohol                     | 0 | 0.7 |
| F32 | Depressive episode                                                       | 0 | 0.5 |
| G20 | Parkinson's disease                                                      | 0 | 1.8 |
| G30 | Alzheimer's disease                                                      | 0 | 4.0 |
| G31 | Other degenerative disorders of nervous system, not elsewhere classified | 0 | 1.2 |
| G40 | Epilepsy                                                                 | 0 | 1.5 |
| G45 | Transient cerebral ischaemic attacks & related syndromes                 | 0 | 1.2 |
| G47 | Sleep disorder & apnoea                                                  | 1 | 0.0 |
| G81 | Hemiplegia                                                               | 0 | 4.4 |
| H02 | Disorders of eyelids                                                     | 1 | 0.0 |
| H35 | Retinopathy & other eye disorders                                        | 1 | 0.0 |
| H40 | Glaucoma & other ocular hypertension                                     | 1 | 0.0 |
| H54 | Blindness & low vision                                                   | 0 | 1.9 |
| H81 | Vertigo or other disorder of vestibular function                         | 1 | 0.0 |
| H91 | Other hearing loss                                                       | 0 | 0.9 |
| I10 | Hypertension                                                             | 1 | 0.0 |
| I11 | Hypertensive heart disease with/without heart failure                    | 1 | 0.0 |
| I20 | Angina                                                                   | 1 | 0.0 |
| I25 | Atherosclerotic heart disease & chronic ischaemic heart disease          | 1 | 0.0 |
| I48 | Atrial fibrillation & atrial flutter                                     | 1 | 0.0 |
| I49 | Cardiac arrhythmia                                                       | 1 | 0.0 |
| I50 | Heart failure                                                            | 1 | 0.0 |
| I63 | Cerebral infarction                                                      | 1 | 0.8 |
| I67 | Cerebral vascular disease                                                | 1 | 2.6 |
| I69 | Late effect of cerebrovascular diseases                                  | 1 | 3.7 |
| I95 | Hypotension                                                              | 0 | 1.6 |
| J18 | Pneumonia                                                                | 1 | 1.1 |
| J22 | Unspecified acute lower respiratory infection                            | 0 | 0.7 |
| J44 | Chronic obstructive pulmonary disease                                    | 1 | 0.0 |
| J45 | Asthma                                                                   | 1 | 0.0 |
| J69 | Pneumonitis due to solids & liquids                                      | 0 | 1.0 |
| J96 | Respiratory failure, not elsewhere classified                            | 0 | 1.5 |

|     |                                                                        |     |     |
|-----|------------------------------------------------------------------------|-----|-----|
| K25 | Gastric ulcer                                                          | 1   | 0.0 |
| K26 | Duodenal ulcer                                                         | 0   | 1.6 |
| K27 | Peptic ulcer                                                           | 1   | 0.0 |
| K30 | Functional dyspepsia                                                   | 1   | 0.0 |
| K52 | Other noninfective gastroenteritis & colitis                           | 0   | 0.3 |
| K59 | Other functional intestinal disorders                                  | 1   | 1.8 |
| K92 | Other diseases of digestive system                                     | 0   | 0.8 |
| L03 | Cellulitis                                                             | 1   | 2.0 |
| L08 | Other local infections of skin & subcutaneous tissue                   | 0   | 0.4 |
| L30 | Dermatitis                                                             | 1   | 0.0 |
| L89 | Decubitus ulcer                                                        | 0   | 1.7 |
| L97 | Ulcer of lower limb, not elsewhere classified                          | 0   | 1.6 |
| M10 | Gout                                                                   | 1   | 0.0 |
| M15 | Polyosteoarthritis                                                     | 1   | 0.4 |
| M19 | Osteoarthritis                                                         | 1   | 1.5 |
| M25 | Other joint disorders, not elsewhere classified                        | 2.3 | 0.0 |
| M41 | Scoliosis                                                              | 0   | 0.9 |
| M48 | Spinal stenosis & spondyloarthropathy                                  | 1   | 0.5 |
| M80 | Osteoporosis with pathological fracture                                | 0   | 0.8 |
| M81 | Osteoporosis                                                           | 1   | 1.4 |
| N17 | Acute renal failure                                                    | 0   | 1.8 |
| N18 | Chronic kidney disease                                                 | 1   | 1.4 |
| N19 | Unspecified renal failure                                              | 0   | 1.6 |
| N20 | Calculus of kidney & ureter                                            | 0   | 0.7 |
| N28 | Other disorders of kidney & ureter, not elsewhere classified           | 0   | 1.3 |
| N39 | Other disorders of urinary system                                      | 1   | 3.2 |
| N40 | Enlarged & nodular prostate                                            | 1   | 0.0 |
| R00 | Abnormalities of heart beat                                            | 0   | 0.7 |
| R02 | Gangrene, not elsewhere classified                                     | 0   | 1.0 |
| R05 | Cough                                                                  | 1   | 0.0 |
| R10 | Abdominal pain                                                         | 1   | 0.0 |
| R11 | Nausea & vomiting                                                      | 0   | 0.3 |
| R13 | Dysphagia                                                              | 0   | 0.8 |
| R26 | Abnormalities of gait & mobility                                       | 0   | 2.6 |
| R29 | Other symptoms & signs involving the nervous & musculoskeletal systems | 0   | 3.6 |
| R31 | Unspecified haematuria                                                 | 0   | 3.0 |
| R32 | Unspecified urinary incontinence                                       | 0   | 1.2 |
| R33 | Retention of urine                                                     | 0   | 1.3 |
| R40 | Somnolence, stupor & coma                                              | 0   | 2.5 |
| R41 | Other symptoms & signs involving cognitive functions & awareness       | 0   | 2.7 |
| R42 | Dizziness & giddiness                                                  | 1   | 0.0 |
| R44 | Other symptoms & signs involving general sensations & perceptions      | 0   | 1.6 |
| R45 | Symptoms & signs involving emotional state                             | 0   | 1.2 |
| R47 | Speech disturbances, not elsewhere classified                          | 0   | 1.0 |

|     |                                                                           |   |     |
|-----|---------------------------------------------------------------------------|---|-----|
| R50 | Fever of unknown origin                                                   | 0 | 0.1 |
| R54 | Senility                                                                  | 0 | 2.2 |
| R55 | Syncope & collapse                                                        | 0 | 1.8 |
| R56 | Convulsions, not elsewhere classified                                     | 0 | 2.6 |
| R63 | Symptoms & signs concerning food & fluid intake                           | 0 | 0.9 |
| R69 | Unknown & unspecified causes of morbidity                                 | 0 | 1.3 |
| R79 | Other abnormal findings of blood chemistry                                | 0 | 0.6 |
| R94 | Abnormal results of function studies                                      | 0 | 1.4 |
| S00 | Superficial injury of head                                                | 0 | 3.2 |
| S01 | Open wound of head                                                        | 0 | 1.1 |
| S06 | Intracranial injury                                                       | 0 | 2.4 |
| S09 | Other & unspecified injuries of head                                      | 0 | 1.2 |
| S22 | Fracture of rib(s), sternum & thoracic spine                              | 0 | 1.8 |
| S32 | Fracture of lumbar spine & pelvis                                         | 0 | 1.4 |
| S42 | Fracture of shoulder & upper arm                                          | 0 | 2.3 |
| S51 | Open wound of forearm                                                     | 0 | 0.5 |
| S72 | Fracture of femur                                                         | 0 | 1.4 |
| S80 | Superficial injury of lower leg                                           | 0 | 2.0 |
| T83 | Complications of genitourinary prosthetic devices, implant s& grafts      | 0 | 2.4 |
| U80 | Agent resistant to penicillin & related antibiotics                       | 0 | 0.8 |
| W01 | Fall on same level from slipping, tripping & stumbling                    | 0 | 0.9 |
| W10 | Fall on & from stairs & steps                                             | 0 | 0.9 |
| W18 | Other fall on same level                                                  | 0 | 2.1 |
| W19 | Unspecified fall                                                          | 0 | 3.2 |
| X59 | Exposure to unspecified factor                                            | 0 | 1.5 |
| Y84 | Other medical procedures as the cause of abnormal reaction of the patient | 0 | 0.7 |
| Y95 | Nosocomial infection                                                      | 0 | 1.2 |
| Z22 | Carrier of infectious disease                                             | 0 | 1.7 |
| Z50 | Care including use of rehabilitation procedures                           | 0 | 2.1 |
| Z60 | Problems related to social environment                                    | 0 | 1.8 |
| Z73 | Problems related to life-management difficulty                            | 0 | 0.6 |
| Z75 | Problems related to medical facilities & other healthcare                 | 0 | 2.0 |
| Z87 | Personal history of other diseases & conditions                           | 0 | 1.5 |
| Z91 | Personal history of risk-factors, not elsewhere classified                | 0 | 0.5 |
| Z93 | Artificial opening status                                                 | 0 | 1.0 |
| Z96 | Presence of functional implant                                            | 1 | 0.0 |
| Z99 | Dependence on enabling machines & devices                                 | 0 | 0.8 |

<sup>1</sup> Multimorbidity frailty index calculated as the total sum of all deficits/ the number of deficits considered in people aged ≥65 years. mFI score of 0–0.0525 designated as fit, 0.0525–0.105 as mild frailty, 0.105–0.1575 as moderate frailty and >0.1575 as severe frailty.

<sup>2</sup>Hospital frailty risk score calculated as the total of the deficits weighted as shown, in people aged ≥75 years. Low risk - score of less than 5, intermediate risk (5–15), high risk (>15).





**Supplementary table 4:** Covariables identified “a priori” as potential effect modifiers of the association between low eGFR and reduced use of invasive management after ACS due to their potential causative association with eGFR, coronary intervention and death.

| <b>Covariables predicted to move effect estimates further from the null</b> | <b>Covariables predicted to move effect estimates closer towards the null</b> |
|-----------------------------------------------------------------------------|-------------------------------------------------------------------------------|
| Older age<br>Female sex<br>Non-White ethnicity                              | Diabetes mellitus<br>Previous history of CVD                                  |

**Supplementary table 5:** Covariables included in the propensity score.

| <b>Items included in the propensity score</b> |
|-----------------------------------------------|
| Age category                                  |
| Obesity                                       |
| Chronic obstructive pulmonary disease         |
| Sex                                           |
| Smoking status                                |
| Cardiovascular disease                        |
| Diabetes mellitus                             |
| Alcohol use                                   |
| Hospital code                                 |
| Family history of ischaemic heart disease     |
| Psychiatric disorder                          |
| Liver disease                                 |
| Mental health disorder                        |
| Malignancy                                    |
| Ethnic category                               |

**Supplementary table 6:** Covariates included in the multiple imputation model.

| <b>Items included in the multiple imputation model</b> |
|--------------------------------------------------------|
| eGFR category                                          |
| Obesity                                                |
| Gender                                                 |
| Smoking status                                         |
| Age category                                           |

Previous cardiovascular disease  
 Chronic obstructive pulmonary disease  
 Diabetes mellitus  
 Ethnic category  
 Hospital code  
 Death by 30 days  
 Comorbidity count  
 Angiography during admission  
 Revascularisation during admission

**Supplementary table 7:** Detailed methodology for sensitivity analyses designed to investigate potential sources of bias in the association between eGFR category and coronary angiography following ACS:

| Objective                                   | Method                                                                                                                                                                                                                                                                                                                                                                                                                                                                                                                                                                                                         |
|---------------------------------------------|----------------------------------------------------------------------------------------------------------------------------------------------------------------------------------------------------------------------------------------------------------------------------------------------------------------------------------------------------------------------------------------------------------------------------------------------------------------------------------------------------------------------------------------------------------------------------------------------------------------|
| <b>To examine the impact of early death</b> | We used different methods to examine the impact of early death on effect estimates. We reclassified patients who died within the first 72 or 24 hours (for NSTEMI-ACS and STEMI respectively) as if they had all received coronary angiography (as an extreme case). We also used multivariable Cox regression analysis, rather than logistic regression, for coronary angiography, considering time to event and censoring.                                                                                                                                                                                   |
| <b>Adjusting for propensity score</b>       | We repeated our logistic regression models adjusting for propensity scores (PS). Covariates were selected based on a confounding relationship between reduced eGFR (eGFR<60mls/min/1.73 <sup>2</sup> ) and outcome (coronary intervention), or an association with the outcome only ( <b>Supplementary table 4</b> ). PS were derived using logistic regression, for patients who did not die within 72 or 24 hours of initial troponin (for NSTEMI-ACS and STEMI respectively). The dependent variable was eGFR <60 versus ≥60mls/min/1.73 <sup>2</sup> . Patients with extreme PS were excluded from further |

|                                                                   |                                                                                                                                                                                                                                                                                                                                                                                                                                                                                                                                                                   |
|-------------------------------------------------------------------|-------------------------------------------------------------------------------------------------------------------------------------------------------------------------------------------------------------------------------------------------------------------------------------------------------------------------------------------------------------------------------------------------------------------------------------------------------------------------------------------------------------------------------------------------------------------|
|                                                                   | <p>analyses. We estimated the probabilities for coronary angiography using logistic regression, with adjustment for the PS.</p> <p>We compared the results of our complete case analysis with those following multiple imputation of missing ethnicity data using chained equations. Covariates in the imputation model were selected if included in the substantive analysis, associated with the missing value or with the mechanism of missingness (<b>Supplementary table 5</b>). Twenty datasets were imputed, and results combined using Rubin's rules.</p> |
| <p><b>To assess robustness of our choice of frailty score</b></p> | <p>We estimated frailty using the Hospital Frailty Risk Score(17) and comorbidity count(18) and assessed the impact of adjusting for each on the association between eGFR category and receipt of coronary angiography, stratified by ACS type (<b>Supplementary table 3</b>).</p>                                                                                                                                                                                                                                                                                |

**Supplementary table 8:** Table of characteristics for patients for whom a kidney test result was available (included in main analyses) and those excluded from analyses due to lack of available kidney test result.

|                                       | <b>Kidney test<br/>result available</b> | <b>No kidney test<br/>result<br/>available</b> |
|---------------------------------------|-----------------------------------------|------------------------------------------------|
|                                       | <b>N=10,216</b>                         | <b>N=56</b>                                    |
| Age (years)                           | 70 (59-80)                              | 66 (59-81)                                     |
| Female gender                         | 3,081 (30.2%)                           | 13 (23.2%)                                     |
| Ethnic category                       |                                         |                                                |
| White                                 | 6,274 (61.4%)                           | 33 (61.2%)                                     |
| Black                                 | 373 (3.7%)                              | 5 (7.5%)                                       |
| Asian                                 | 1,059 (10.4%)                           | <5 (<5%)                                       |
| Mixed                                 | 656 (6.4%)                              | <5 (<5%)                                       |
| Missing                               | 1,853 (18.2%)                           | 15 (22.4%)                                     |
| Smoking history                       |                                         |                                                |
| Never smoked                          | 5,794 (56.7%)                           | 46 (82.1%)                                     |
| Ex smoker                             | 2,052 (20.1%)                           | 5 (8.9%)                                       |
| Current smoker                        | 2,370 (23.2%)                           | 5 (8.9%)                                       |
| Diabetes mellitus                     | 2,432 (23.8%)                           | 10 (17.9%)                                     |
| Any cardiovascular disease            | 8,394 (82.2%)                           | 36 (64.3%)                                     |
| Hypercholesterolaemia                 | 3,538 (34.6%)                           | 16 (28.6%)                                     |
| Family history of IHD                 | 1,840 (18.0%)                           | <5 (<5%)                                       |
| Arrhythmia                            | 1,203 (11.8%)                           | <5 (<5%)                                       |
| Aortic stenosis                       | 244 (2.4%)                              | <5 (<5%)                                       |
| Congestive heart failure              | 1,456 (14.3%)                           | <5 (<5%)                                       |
| Venous thrombo-embolism               | 33 (0.3%)                               | <5 (<5%)                                       |
| Chronic obstructive pulmonary disease | 580 (5.7%)                              | <5 (<5%)                                       |
| Cerebrovascular event                 | 96 (0.9%)                               | <5 (<5%)                                       |
| Mental health disorder                | 2,358 (23.1%)                           | <5 (<5%)                                       |
| Liver disease                         | 70 (0.7%)                               | <5 (<5%)                                       |
| Malignancy                            | 558 (5.5%)                              | <5 (<5%)                                       |
| Obesity                               | 1,061 (10.4%)                           | <5 (<5%)                                       |

**Supplementary table 9:** Multivariable-adjusted odds of inpatient angiography by eGFR category and ACS type using different methods of adjustment for the competing risk of death.

| ACS type                                         | eGFR category                 | NSTE-ACS |             |         | STEMI |             |         |
|--------------------------------------------------|-------------------------------|----------|-------------|---------|-------|-------------|---------|
|                                                  |                               | OR/HR    | 95% CI      | p-value | OR/HR | 95% CI      | p-value |
| <b>No adjustment<sup>1</sup></b>                 | >90mls/min/1.73m <sup>2</sup> | 1.00     |             |         | 1.00  |             |         |
|                                                  | 60-89                         | 1.05     | 0.88 - 1.26 | 0.60    | 1.21  | 0.85 - 1.72 | 0.30    |
|                                                  | 45-59                         | 0.95     | 0.75 - 1.22 | 0.70    | 0.74  | 0.46 - 1.18 | 0.20    |
|                                                  | 30-44                         | 0.74     | 0.56 - 0.97 | 0.03    | 0.34  | 0.20 - 0.57 | <0.01   |
|                                                  | <30                           | 0.57     | 0.43 - 0.75 | <0.01   | 0.25  | 0.15 - 0.43 | <0.01   |
|                                                  | Linear trend                  |          |             | <0.01   |       |             | <0.01   |
| <b>Early deaths dropped<sup>1</sup></b>          | >90mls/min/1.73m <sup>2</sup> | 1.00     |             |         | 1.00  |             |         |
|                                                  | 60-89                         | 1.05     | 0.88 - 1.27 | 0.58    | 1.20  | 0.84 - 1.71 | 0.31    |
|                                                  | 45-59                         | 0.98     | 0.77 - 1.26 | 0.87    | 0.77  | 0.47 - 1.24 | 0.28    |
|                                                  | 30-44                         | 0.76     | 0.57 - 1.01 | 0.06    | 0.33  | 0.20 - 0.56 | <0.01   |
|                                                  | <30                           | 0.58     | 0.44 - 0.77 | <0.01   | 0.28  | 0.16 - 0.48 | <0.01   |
|                                                  | Linear trend                  |          |             | <0.01   |       |             | <0.01   |
| <b>Early deaths treated as cases<sup>1</sup></b> | >90mls/min/1.73m <sup>2</sup> | 1.00     |             |         | 1.00  |             |         |
|                                                  | 60-89                         | 1.02     | 0.85 - 1.21 | 0.86    | 1.07  | 0.77 - 1.49 | 0.69    |
|                                                  | 45-59                         | 0.98     | 0.78 - 1.24 | 0.88    | 0.74  | 0.47 - 1.17 | 0.19    |
|                                                  | 30-44                         | 0.89     | 0.68 - 1.17 | 0.41    | 0.36  | 0.22 - 0.59 | <0.01   |
|                                                  | <30                           | 0.80     | 0.61 - 1.04 | 0.09    | 0.36  | 0.21 - 0.60 | <0.01   |
|                                                  | Linear trend                  |          |             | 0.06    |       |             | <0.01   |
| <b>Cox regression<sup>2</sup></b>                | >90mls/min/1.73m <sup>2</sup> | 1.00     |             |         | 1.00  |             |         |
|                                                  | 60-89                         | 1.01     | 0.92 - 1.11 | 0.78    | 1.02  | 0.93 - 1.13 | 0.63    |
|                                                  | 45-59                         | 0.89     | 0.78 - 1.02 | 0.09    | 0.91  | 0.77 - 1.07 | 0.26    |
|                                                  | 30-44                         | 0.67     | 0.57 - 0.80 | <0.01   | 0.72  | 0.58 - 0.89 | <0.01   |
|                                                  | <30                           | 0.52     | 0.43 - 0.62 | <0.01   | 0.58  | 0.46 - 0.74 | <0.01   |
|                                                  | Linear trend                  |          |             | <0.01   |       |             | <0.01   |

<sup>1</sup> Expressed as odds ratio

<sup>2</sup> Expressed as hazard ratio

**Supplementary table 10.** Comparison of effect estimates for the odds of inpatient angiography for people with eGFR<60mls/min/1.73m<sup>2</sup> versus those with an eGFR≥60 between multivariable and propensity score adjusted models, by ACS type.

| ACS type        | eGFR category | Multivariable-adjusted |             |         | Propensity score-adjusted |           |         |
|-----------------|---------------|------------------------|-------------|---------|---------------------------|-----------|---------|
|                 |               | OR                     | 95% CI      | p-value | OR                        | 95% CI    | p-value |
| <b>NSTE-ACS</b> | Normal eGFR   | 1                      |             |         | 1                         |           |         |
|                 | eGFR<60       | 0.76                   | 0.65 - 0.87 | <0.01   | 0.77                      | 0.67-0.89 | <0.01   |
| <b>STEMI</b>    | Normal eGFR   | 1                      |             |         | 1                         |           |         |
|                 | eGFR<60       | 0.41                   | 0.30-0.55   | <0.01   | 0.52                      | 0.39-0.69 | <0.01   |

**Supplementary table 11:** Comparison of the multivariable-adjusted odds of inpatient angiography by eGFR category and ACS type using a complete case analysis versus multiple imputation of missing ethnicity data.

| ACS type | eGFR category                 | Complete case analysis |             |         | Multiple imputation for ethnic category |             |         |
|----------|-------------------------------|------------------------|-------------|---------|-----------------------------------------|-------------|---------|
|          |                               | OR/HR                  | 95% CI      | p-value | OR/HR                                   | 95% CI      | p-value |
| NSTE-ACS | >90mls/min/1.73m <sup>2</sup> | 1.00                   |             |         | 1.00                                    |             |         |
|          | 60-89                         | 1.05                   | 0.88 - 1.27 | 0.58    | 1.07                                    | 0.91 - 1.27 | 0.40    |
|          | 45-59                         | 0.98                   | 0.77 - 1.26 | 0.87    | 0.94                                    | 0.75 - 1.17 | 0.57    |
|          | 30-44                         | 0.76                   | 0.57 - 1.01 | 0.06    | 0.79                                    | 0.61 - 1.03 | 0.08    |
|          | <30                           | 0.58                   | 0.44 - 0.77 | <0.01   | 0.56                                    | 0.43 - 0.74 | <0.01   |
|          | Linear trend                  |                        |             | <0.01   |                                         |             | <0.01   |
| STEMI    | >90mls/min/1.73m <sup>2</sup> | 1.00                   |             |         | 1.00                                    |             |         |
|          | 60-89                         | 1.20                   | 0.84 - 1.71 | 0.31    | 1.03                                    | 0.77 - 1.38 | 0.85    |
|          | 45-59                         | 0.77                   | 0.47 - 1.24 | 0.28    | 0.75                                    | 0.49 - 1.14 | 0.18    |
|          | 30-44                         | 0.33                   | 0.20 - 0.56 | <0.01   | 0.42                                    | 0.26 - 0.66 | <0.01   |
|          | <30                           | 0.28                   | 0.16 - 0.48 | <0.01   | 0.35                                    | 0.21 - 0.56 | <0.01   |
|          | Linear trend                  |                        |             | <0.01   |                                         |             | <0.01   |

**Supplementary table 12:** Multivariable-adjusted odds of inpatient angiography by eGFR category and ACS type, with adjustment for Multimorbidity frailty index, Hospital frailty risk score or comorbidity count.

| ACS type                              | eGFR category                 | NSTEMI-ACS |             |         | STEMI |             |         |
|---------------------------------------|-------------------------------|------------|-------------|---------|-------|-------------|---------|
|                                       |                               | OR         | 95% CI      | p-value | OR    | 95% CI      | p-value |
| <b>No adjustment for frailty</b>      | >90mls/min/1.73m <sup>2</sup> | 1.00       |             |         | 1.00  |             |         |
|                                       | 60-89                         | 1.05       | 0.88 - 1.27 | 0.58    | 1.20  | 0.84 - 1.71 | 0.31    |
|                                       | 45-59                         | 0.98       | 0.77 - 1.26 | 0.87    | 0.77  | 0.47 - 1.24 | 0.28    |
|                                       | 30-44                         | 0.76       | 0.57 - 1.01 | 0.06    | 0.33  | 0.20 - 0.56 | <0.01   |
|                                       | <30                           | 0.58       | 0.44 - 0.77 | <0.01   | 0.28  | 0.16 - 0.48 | <0.01   |
|                                       | Linear trend                  |            |             | <0.01   |       |             | <0.01   |
| <b>Adjusted for mFI<sup>1</sup></b>   | >90mls/min/1.73m <sup>2</sup> | 1.00       |             |         | 1.00  |             |         |
|                                       | 60-89                         | 1.05       | 0.88 - 1.27 | 0.57    | 1.20  | 0.84 - 1.71 | 0.31    |
|                                       | 45-59                         | 0.98       | 0.76 - 1.25 | 0.85    | 0.77  | 0.47 - 1.24 | 0.28    |
|                                       | 30-44                         | 0.75       | 0.57 - 1.00 | 0.05    | 0.33  | 0.20 - 0.56 | <0.01   |
|                                       | <30                           | 0.57       | 0.43 - 0.76 | <0.01   | 0.28  | 0.16 - 0.49 | <0.01   |
|                                       | Linear trend                  |            |             | <0.01   |       |             | <0.01   |
| <b>Adjusted for HFRS<sup>2</sup></b>  | >90mls/min/1.73m <sup>2</sup> | 1.00       |             |         | 1.00  |             |         |
|                                       | 60-89                         | 1.02       | 0.85 - 1.23 | 0.83    | 1.18  | 0.83 - 1.68 | 0.36    |
|                                       | 45-59                         | 0.97       | 0.76 - 1.24 | 0.81    | 0.78  | 0.48 - 1.27 | 0.32    |
|                                       | 30-44                         | 0.78       | 0.59 - 1.04 | 0.09    | 0.36  | 0.21 - 0.61 | <0.01   |
|                                       | <30                           | 0.65       | 0.49 - 0.87 | <0.01   | 0.36  | 0.20 - 0.64 | <0.01   |
|                                       | Linear trend                  |            |             | <0.01   |       |             | <0.01   |
| <b>Adjusted for comorbidity count</b> | >90mls/min/1.73m <sup>2</sup> | 1.00       |             |         | 1.00  |             |         |
|                                       | 60-89                         | 1.06       | 0.88 - 1.27 | 0.55    | 1.23  | 0.86 - 1.76 | 0.25    |
|                                       | 45-59                         | 0.99       | 0.77 - 1.27 | 0.93    | 0.82  | 0.50 - 1.33 | 0.42    |
|                                       | 30-44                         | 0.76       | 0.58 - 1.02 | 0.06    | 0.37  | 0.22 - 0.63 | <0.01   |
|                                       | <30                           | 0.59       | 0.44 - 0.78 | <0.01   | 0.32  | 0.19 - 0.56 | <0.01   |
|                                       | Linear trend                  |            |             | <0.01   |       |             | <0.01   |

<sup>1</sup> Multimorbidity Frailty Index; <sup>2</sup>Hospital Frailty Risk Score



**Supplementary table 13:** Multivariable-adjusted odds of inpatient angiography by ACS type, with and without adjustment for clustering at the hospital level.

| ACS type | eGFR category                 | Unadjusted |             |         | Adjusted for clustering by hospital |             |         |
|----------|-------------------------------|------------|-------------|---------|-------------------------------------|-------------|---------|
|          |                               | OR         | 95% CI      | p-value | OR                                  | 95% CI      | p-value |
| NSTE-ACS | >90mls/min/1.73m <sup>2</sup> | 1.00       |             |         | 1.00                                |             |         |
|          | 60-89                         | 1.05       | 0.88 - 1.27 | 0.58    | 1.05                                | 0.89 - 1.24 | 0.53    |
|          | 45-59                         | 0.98       | 0.77 - 1.26 | 0.87    | 0.98                                | 0.85 - 1.13 | 0.78    |
|          | 30-44                         | 0.76       | 0.57 - 1.01 | 0.06    | 0.76                                | 0.55 - 1.06 | 0.11    |
|          | <30                           | 0.58       | 0.44 - 0.77 | <0.01   | 0.58                                | 0.46 - 0.73 | <0.01   |
|          | Linear trend                  |            |             | <0.01   |                                     |             | <0.01   |
| STEMI    | >90mls/min/1.73m <sup>2</sup> | 1.00       |             |         | 1.00                                |             |         |
|          | 60-89                         | 1.20       | 0.84 - 1.71 | 0.31    | 1.20                                | 1.05 - 1.37 | 0.01    |
|          | 45-59                         | 0.77       | 0.47 - 1.24 | 0.28    | 0.77                                | 0.54 - 1.08 | 0.13    |
|          | 30-44                         | 0.33       | 0.20 - 0.56 | <0.01   | 0.33                                | 0.28 - 0.39 | <0.01   |
|          | <30                           | 0.28       | 0.16 - 0.48 | <0.01   | 0.28                                | 0.23 - 0.34 | <0.01   |
|          | Linear trend                  |            |             | <0.01   |                                     |             | <0.01   |

**Supplementary table 14:** Multivariable-adjusted odds ratios for inpatient angiography adjusted for composite CVD variable versus multiple distinct CVD-related variables

| ACS type | eGFR category                 | Composite CVD variable <sup>1</sup> |             |         | Individual CVD variables <sup>2</sup> |             |         |
|----------|-------------------------------|-------------------------------------|-------------|---------|---------------------------------------|-------------|---------|
|          |                               | OR                                  | 95% CI      | p-value | OR                                    | 95% CI      | p-value |
| NSTE-ACS | >90mls/min/1.73m <sup>2</sup> | 1.00                                |             |         | 1.00                                  |             |         |
|          | 60-89                         | 1.05                                | 0.88 - 1.27 | 0.58    | 1.02                                  | 0.84 - 1.23 | 0.86    |
|          | 45-59                         | 0.98                                | 0.77 - 1.26 | 0.87    | 0.98                                  | 0.76 - 1.27 | 0.90    |
|          | 30-44                         | 0.76                                | 0.57 - 1.01 | 0.06    | 0.83                                  | 0.61 - 1.11 | 0.20    |
|          | <30                           | 0.58                                | 0.44 - 0.77 | <0.01   | 0.60                                  | 0.45 - 0.80 | <0.01   |
|          | Linear trend                  |                                     |             | <0.01   |                                       |             | <0.01   |
| STEMI    | >90mls/min/1.73m <sup>2</sup> | 1.00                                |             |         | 1.00                                  |             |         |
|          | 60-89                         | 1.20                                | 0.84 - 1.71 | 0.31    | 1.19                                  | 0.83 - 1.71 | 0.35    |
|          | 45-59                         | 0.77                                | 0.47 - 1.24 | 0.28    | 0.80                                  | 0.48 - 1.33 | 0.39    |
|          | 30-44                         | 0.33                                | 0.20 - 0.56 | <0.01   | 0.30                                  | 0.17 - 0.53 | <0.01   |
|          | <30                           | 0.28                                | 0.16 - 0.48 | <0.01   | 0.29                                  | 0.16 - 0.52 | <0.01   |
|          | Linear trend                  |                                     |             | <0.01   |                                       |             | <0.01   |

<sup>1</sup> Composite CVD variable includes ischaemic heart disease, peripheral vascular disease, aortic aneurysm, ischaemic cerebrovascular event, haemorrhagic cerebrovascular event, transient ischaemic attack, prior myocardial infarction, congestive heart failure, stable angina.

<sup>2</sup>Above items included as individual covariates in model

**Supplementary table 15:** Multivariable-adjusted odds ratios for inpatient angiography without and with inclusion of people with a first troponin value recorded within the 24 hours following a coronary intervention.

| ACS type | eGFR category                 | Post procedure troponin excluded |             |         | Post procedure troponin included |             |         |
|----------|-------------------------------|----------------------------------|-------------|---------|----------------------------------|-------------|---------|
|          |                               | OR                               | 95% CI      | p-value | OR                               | 95% CI      | p-value |
| NSTE-ACS | >90mls/min/1.73m <sup>2</sup> | 1                                |             |         | 1                                |             |         |
|          | 60-89                         | 1.07                             | 0.91 - 1.27 | 0.42    | 1.06                             | 0.88 - 1.27 | 0.54    |
|          | 45-59                         | 0.94                             | 0.75 - 1.18 | 0.59    | 1                                | 0.78 - 1.28 | 1       |
|          | 30-44                         | 0.79                             | 0.61 - 1.02 | 0.07    | 0.8                              | 0.60 - 1.06 | 0.12    |
|          | <30                           | 0.56                             | 0.43 - 0.73 | <0.01   | 0.63                             | 0.47 - 0.83 | <0.01   |
|          | Linear trend                  |                                  |             |         |                                  |             |         |
| STEMI    | >90mls/min/1.73m <sup>2</sup> | 1                                |             |         | 1                                |             |         |
|          | 60-89                         | 1.03                             | 0.77 - 1.39 | 0.82    | 1.19                             | 0.83 - 1.69 | 0.34    |
|          | 45-59                         | 0.77                             | 0.50 - 1.17 | 0.22    | 0.77                             | 0.48 - 1.23 | 0.27    |
|          | 30-44                         | 0.42                             | 0.27 - 0.66 | <0.01   | 0.33                             | 0.20 - 0.56 | <0.01   |
|          | <30                           | 0.35                             | 0.21 - 0.56 | <0.01   | 0.29                             | 0.17 - 0.50 | <0.01   |
|          | Linear trend                  |                                  |             |         |                                  |             |         |

**Supplementary table 16:** Multivariable-adjusted odds of angiography by eGFR category and ACS type, with and without inclusion of patients with a code for revascularization but not for angiography

| ACS type | eGFR category                 | Assuming revascularized patients received angiography |             |         | Exclusion of revascularized patients without angiography |             |         |
|----------|-------------------------------|-------------------------------------------------------|-------------|---------|----------------------------------------------------------|-------------|---------|
|          |                               | OR                                                    | 95% CI      | p-value | OR                                                       | 95% CI      | p-value |
| NSTE-ACS | >90mls/min/1.73m <sup>2</sup> | 1.00                                                  |             |         | 1.00                                                     |             |         |
|          | 60-89                         | 1.05                                                  | 0.88 - 1.27 | 0.58    | 1.05                                                     | 0.87 - 1.27 | 0.60    |
|          | 45-59                         | 0.98                                                  | 0.77 - 1.26 | 0.87    | 0.98                                                     | 0.76 - 1.26 | 0.86    |
|          | 30-44                         | 0.76                                                  | 0.57 - 1.01 | 0.06    | 0.76                                                     | 0.57 - 1.02 | 0.07    |
|          | <30                           | 0.58                                                  | 0.44 - 0.77 | <0.01   | 0.59                                                     | 0.44 - 0.79 | <0.01   |
|          | Linear trend                  |                                                       |             | <0.01   |                                                          |             | <0.01   |
| STEMI    | >90mls/min/1.73m <sup>2</sup> | 1.00                                                  |             |         | 1.00                                                     |             |         |
|          | 60-89                         | 1.20                                                  | 0.84 - 1.71 | 0.31    | 1.19                                                     | 0.84 - 1.70 | 0.33    |
|          | 45-59                         | 0.77                                                  | 0.47 - 1.24 | 0.28    | 0.77                                                     | 0.48 - 1.24 | 0.28    |
|          | 30-44                         | 0.33                                                  | 0.20 - 0.56 | <0.01   | 0.32                                                     | 0.19 - 0.55 | <0.01   |
|          | <30                           | 0.28                                                  | 0.16 - 0.48 | <0.01   | 0.27                                                     | 0.16 - 0.47 | <0.01   |
|          | Linear trend                  |                                                       |             | <0.01   |                                                          |             | <0.01   |

**Supplementary table 17:** Multivariable-adjusted odds ratios for inpatient angiography and revascularisation by eGFR category for people with NSTEMI-ACS with and without inclusion of those with unstable angina.

| Outcome           | eGFR category                 | Inclusion of unstable angina |             |         | Exclusion of unstable angina |             |         |
|-------------------|-------------------------------|------------------------------|-------------|---------|------------------------------|-------------|---------|
|                   |                               | OR                           | 95% CI      | p-value | OR                           | 95% CI      | p-value |
| Angio             | >90mls/min/1.73m <sup>2</sup> | 1.00                         |             |         | 1.00                         |             |         |
|                   | 60-89                         | 1.05                         | 0.88 - 1.27 | 0.58    | 1.07                         | 0.84 - 1.36 | 0.60    |
|                   | 45-59                         | 0.98                         | 0.77 - 1.26 | 0.87    | 0.78                         | 0.58 - 1.06 | 0.12    |
|                   | 30-44                         | 0.76                         | 0.57 - 1.01 | 0.06    | 0.64                         | 0.46 - 0.91 | 0.01    |
|                   | <30                           | 0.58                         | 0.44 - 0.77 | <0.01   | 0.40                         | 0.29 - 0.56 | <0.01   |
|                   | Linear trend                  |                              |             | <0.01   |                              |             | <0.01   |
| Revascularisation | >90mls/min/1.73m <sup>2</sup> | 1.00                         |             |         | 1.00                         |             |         |
|                   | 60-89                         | 0.98                         | 0.83 - 1.17 | 0.83    | 0.97                         | 0.78 - 1.21 | 0.81    |
|                   | 45-59                         | 0.82                         | 0.65 - 1.04 | 0.10    | 0.69                         | 0.52 - 0.92 | 0.01    |
|                   | 30-44                         | 0.62                         | 0.47 - 0.82 | <0.01   | 0.58                         | 0.42 - 0.81 | <0.01   |
|                   | <30                           | 0.53                         | 0.40 - 0.70 | <0.01   | 0.40                         | 0.29 - 0.55 | <0.01   |
|                   | Linear trend                  |                              |             | <0.01   |                              |             | <0.01   |

**Supplementary table 18:** Multivariable-adjusted odds ratios for revascularisation by eGFR category and ACS type, stratified by age group.

| ACS type        | eGFR category                 | < 65 years |      |             |         | 65 - 75 years |      |             |         | >75 years |      |             |         |
|-----------------|-------------------------------|------------|------|-------------|---------|---------------|------|-------------|---------|-----------|------|-------------|---------|
|                 |                               | N          | OR   | 95% CI      | p-value | N             | OR   | 95% CI      | p-value | N         | OR   | 95% CI      | p-value |
| <b>NSTE-ACS</b> | ≥90mls/min/1.73m <sup>2</sup> | 1,074      | 1    |             |         | 333           | 1    |             |         | 63        | 1    |             |         |
|                 | 60-89                         | 442        | 1.08 | 0.85 - 1.37 | 0.55    | 737           | 0.79 | 0.59 - 1.05 | 0.11    | 1,077     | 1.08 | 0.65 - 1.78 | 0.77    |
|                 | 45-59                         | 59         | 0.83 | 0.49 - 1.44 | 0.51    | 136           | 0.70 | 0.45 - 1.09 | 0.12    | 496       | 0.74 | 0.44 - 1.24 | 0.25    |
|                 | 30-44                         | 31         | 0.35 | 0.16 - 0.77 | 0.01    | 73            | 0.41 | 0.23 - 0.72 | <0.01   | 334       | 0.59 | 0.35 - 1.02 | 0.06    |
|                 | <30                           | 50         | 0.63 | 0.35 - 1.13 | 0.12    | 109           | 0.50 | 0.30 - 0.81 | 0.01    | 237       | 0.46 | 0.26 - 0.81 | 0.01    |
| <b>STEMI</b>    | ≥90mls/min/1.73m <sup>2</sup> | 976        | 1    |             |         | 249           | 1    |             |         | 25        | 1    |             |         |
|                 | 60-89                         | 375        | 1.04 | 0.73 - 1.47 | 0.85    | 420           | 1.24 | 0.78 - 1.98 | 0.36    | 436       | 2.74 | 1.12 - 6.69 | 0.03    |
|                 | 45-59                         | 48         | 1.42 | 0.58 - 3.49 | 0.44    | 66            | 0.89 | 0.42 - 1.86 | 0.75    | 135       | 2.00 | 0.77 - 5.14 | 0.15    |
|                 | 30-44                         | 24         | 0.26 | 0.11 - 0.63 | <0.01   | 24            | 0.24 | 0.09 - 0.62 | <0.01   | 100       | 1.33 | 0.50 - 3.49 | 0.57    |
|                 | <30                           | 20         | 0.77 | 0.24 - 2.44 | 0.65    | 22            | 0.22 | 0.08 - 0.58 | <0.01   | 83        | 1.33 | 0.50 - 3.58 | 0.57    |

**Supplementary table 19:** Multivariable-adjusted odds ratios for revascularisation after STEMI comparing eGFR>60mls/min/1.73m<sup>2</sup> to eGFR categories <60, stratified by age group.

| ACS type     | eGFR category                 | < 65 years |      |             |         | 65 - 75 years |      |             |         | >75 years |      |             |         |
|--------------|-------------------------------|------------|------|-------------|---------|---------------|------|-------------|---------|-----------|------|-------------|---------|
|              |                               | N          | OR   | 95% CI      | p-value | N             | OR   | 95% CI      | p-value | N         | OR   | 95% CI      | p-value |
| <b>STEMI</b> | ≥60mls/min/1.73m <sup>2</sup> | 1,351      | 1    |             |         | 669           | 1    |             |         | 461       | 1    |             |         |
|              | 45-59                         | 48         | 1.4  | 0.58 - 3.42 | 0.46    | 66            | 0.77 | 0.39 - 1.52 | 0.45    | 135       | 0.78 | 0.49 - 1.23 | 0.28    |
|              | 30-44                         | 24         | 0.26 | 0.11 - 0.62 | <0.01   | 24            | 0.21 | 0.09 - 0.51 | <0.01   | 100       | 0.52 | 0.31 - 0.86 | 0.01    |
|              | <30                           | 20         | 0.76 | 0.24 - 2.40 | 0.64    | 22            | 0.19 | 0.07 - 0.48 | <0.01   | 83        | 0.52 | 0.30 - 0.89 | 0.02    |

Supplementary table 19: STROBE Reporting Checklist

|                          | Item No. | Recommendation                                                                                                                                                                                                                                                                                                                                                                                                                                                                                                                                                                                                                                                                                                   | Page No. |
|--------------------------|----------|------------------------------------------------------------------------------------------------------------------------------------------------------------------------------------------------------------------------------------------------------------------------------------------------------------------------------------------------------------------------------------------------------------------------------------------------------------------------------------------------------------------------------------------------------------------------------------------------------------------------------------------------------------------------------------------------------------------|----------|
|                          | 1        | (a) Indicate the study's design with a commonly used term in the title or the abstract<br><br>(b) Provide in the abstract an informative and balanced summary of what was done and what was found                                                                                                                                                                                                                                                                                                                                                                                                                                                                                                                | 2        |
| <b>Introduction</b>      |          |                                                                                                                                                                                                                                                                                                                                                                                                                                                                                                                                                                                                                                                                                                                  |          |
| Background/rationale     | 2        | Explain the scientific background and rationale for the investigation being reported                                                                                                                                                                                                                                                                                                                                                                                                                                                                                                                                                                                                                             | 5        |
| Objectives               | 3        | State specific objectives, including any prespecified hypotheses                                                                                                                                                                                                                                                                                                                                                                                                                                                                                                                                                                                                                                                 | 6        |
| <b>Methods</b>           |          |                                                                                                                                                                                                                                                                                                                                                                                                                                                                                                                                                                                                                                                                                                                  |          |
| Study design             | 4        | Present key elements of study design early in the paper                                                                                                                                                                                                                                                                                                                                                                                                                                                                                                                                                                                                                                                          | 6        |
| Setting                  | 5        | Describe the setting, locations, and relevant dates, including periods of recruitment, exposure, follow-up, and data collection                                                                                                                                                                                                                                                                                                                                                                                                                                                                                                                                                                                  | 6        |
| Participants             | 6        | (a) <i>Cohort study</i> —Give the eligibility criteria, and the sources and methods of selection of participants. Describe methods of follow-up<br><br><i>Case-control study</i> —Give the eligibility criteria, and the sources and methods of case ascertainment and control selection. Give the rationale for the choice of cases and controls<br><br><i>Cross-sectional study</i> —Give the eligibility criteria, and the sources and methods of selection of participants<br><br>(b) <i>Cohort study</i> —For matched studies, give matching criteria and number of exposed and unexposed<br><br><i>Case-control study</i> —For matched studies, give matching criteria and the number of controls per case | 6-7      |
| Variables                | 7        | Clearly define all outcomes, exposures, predictors, potential confounders, and effect modifiers. Give diagnostic criteria, if applicable                                                                                                                                                                                                                                                                                                                                                                                                                                                                                                                                                                         | 6-7      |
| Data sources/measurement | 8*       | For each variable of interest, give sources of data and details of methods of assessment (measurement). Describe comparability of assessment methods if there is more than one group                                                                                                                                                                                                                                                                                                                                                                                                                                                                                                                             | 6-7      |
| Bias                     | 9        | Describe any efforts to address potential sources of bias                                                                                                                                                                                                                                                                                                                                                                                                                                                                                                                                                                                                                                                        | 9        |
| Study size               | 10       | Explain how the study size was arrived at                                                                                                                                                                                                                                                                                                                                                                                                                                                                                                                                                                                                                                                                        | 6        |
| Quantitative variables   | 11       | Explain how quantitative variables were handled in the analyses. If applicable, describe which groupings were chosen and why                                                                                                                                                                                                                                                                                                                                                                                                                                                                                                                                                                                     | 7        |
| Statistical methods      | 12       | (a) Describe all statistical methods, including those used to control for confounding                                                                                                                                                                                                                                                                                                                                                                                                                                                                                                                                                                                                                            | 8-9      |

|                  |     |                                                                                                                                                                                                              |                     |
|------------------|-----|--------------------------------------------------------------------------------------------------------------------------------------------------------------------------------------------------------------|---------------------|
|                  |     | (b) Describe any methods used to examine subgroups and interactions                                                                                                                                          | 9                   |
|                  |     | (c) Explain how missing data were addressed                                                                                                                                                                  | 9                   |
|                  |     | (d) <i>Cohort study</i> —If applicable, explain how loss to follow-up was addressed                                                                                                                          | N/a                 |
|                  |     | <i>Case-control study</i> —If applicable, explain how matching of cases and controls was addressed                                                                                                           |                     |
|                  |     | <i>Cross-sectional study</i> —If applicable, describe analytical methods taking account of sampling strategy                                                                                                 |                     |
|                  |     | (e) Describe any sensitivity analyses                                                                                                                                                                        | 9                   |
| Participants     | 13* | (a) Report numbers of individuals at each stage of study—eg numbers potentially eligible, examined for eligibility, confirmed eligible, included in the study, completing follow-up, and analysed            | 9 (Also S. Table 1) |
|                  |     | (b) Give reasons for non-participation at each stage                                                                                                                                                         | S. Table 1          |
|                  |     | (c) Consider use of a flow diagram                                                                                                                                                                           | S. Table 1          |
| Descriptive data | 14* | (a) Give characteristics of study participants (eg demographic, clinical, social) and information on exposures and potential confounders                                                                     | Table 1             |
|                  |     | (b) Indicate number of participants with missing data for each variable of interest                                                                                                                          | Table 1             |
|                  |     | (c) <i>Cohort study</i> —Summarise follow-up time (eg, average and total amount)                                                                                                                             | 10                  |
| Outcome data     | 15* | <i>Cohort study</i> —Report numbers of outcome events or summary measures over time                                                                                                                          | Tables 2-5          |
|                  |     | <i>Case-control study</i> —Report numbers in each exposure category, or summary measures of exposure                                                                                                         |                     |
|                  |     | <i>Cross-sectional study</i> —Report numbers of outcome events or summary measures                                                                                                                           |                     |
| Main results     | 16  | (a) Give unadjusted estimates and, if applicable, confounder-adjusted estimates and their precision (eg, 95% confidence interval). Make clear which confounders were adjusted for and why they were included | Tables 2-5          |
|                  |     | (b) Report category boundaries when continuous variables were categorized                                                                                                                                    | 6                   |
|                  |     | (c) If relevant, consider translating estimates of relative risk into absolute risk for a meaningful time period                                                                                             | Tables 2,4          |
| Other analyses   | 17  | Report other analyses done—eg analyses of subgroups and interactions, and sensitivity analyses                                                                                                               | 13                  |
| Key results      | 18  | Summarise key results with reference to study objectives                                                                                                                                                     | 13-14               |

|                          |    |                                                                                                                                                                            |    |
|--------------------------|----|----------------------------------------------------------------------------------------------------------------------------------------------------------------------------|----|
| Limitations              | 19 | Discuss limitations of the study, taking into account sources of potential bias or imprecision. Discuss both direction and magnitude of any potential bias                 | 16 |
| Interpretation           | 20 | Give a cautious overall interpretation of results considering objectives, limitations, multiplicity of analyses, results from similar studies, and other relevant evidence | 16 |
| Generalisability         | 21 | Discuss the generalisability (external validity) of the study results                                                                                                      | 15 |
| <b>Other information</b> |    |                                                                                                                                                                            |    |
| Funding                  | 22 | Give the source of funding and the role of the funders for the present study and, if applicable, for the original study on which the present article is based              | 18 |



## Figures

**Supplementary figure 1:** Flow chart of inclusion/exclusion

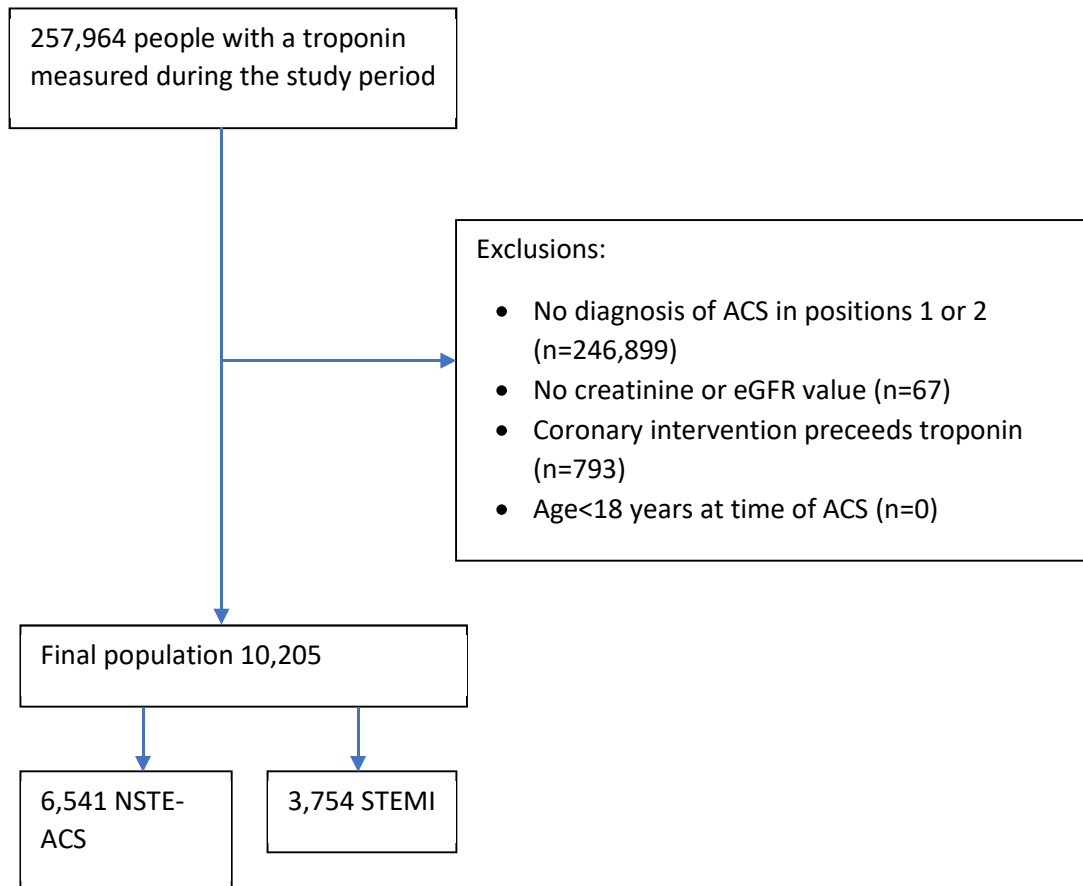

Supplement: openhrt-11-2-s001.pdf [file openhrt-11-2-s001.pdf]
